# Supplementary material
Source: publisher figshare collection journal article supplement (https://gsajournals.figshare.com/ndownloader/files/18182876)
Supplement: Supplementary file 1 [file 18182876]

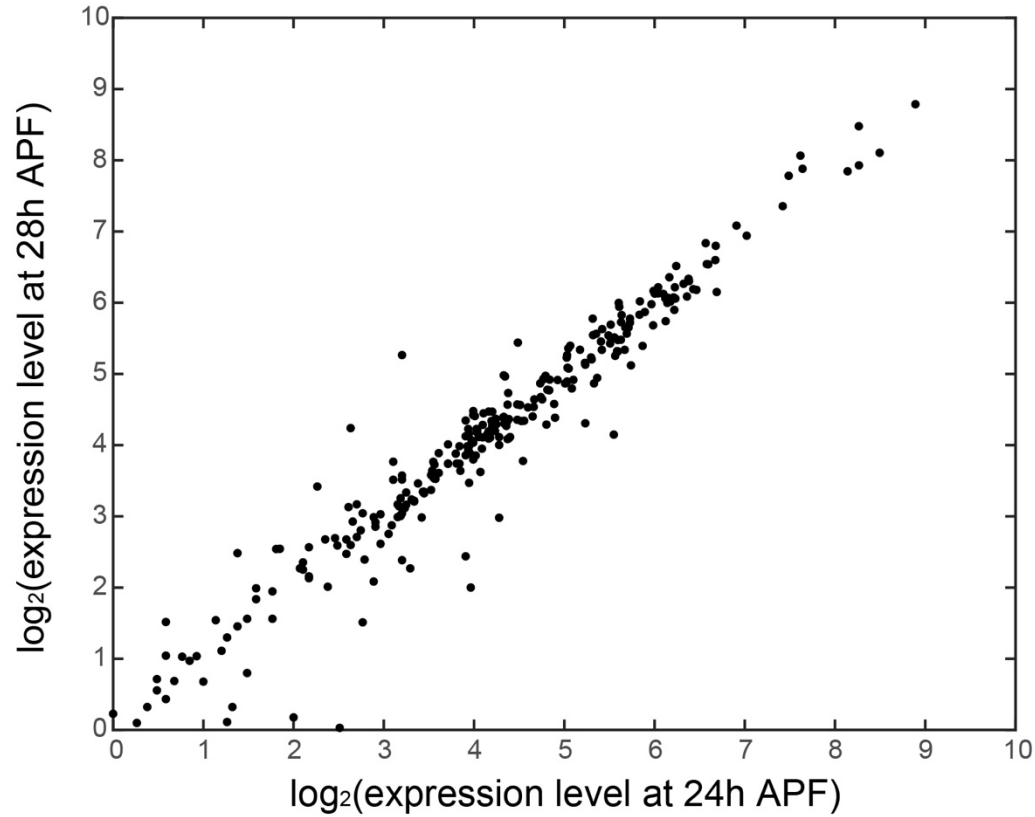

**Supplemental Figure 1: Correlation of gene expression levels in male terminalia at 24h and 28h APF.** For transcription factors expressed at levels greater than 1 read per kilobase per million reads (rpkm) at 28h after puparium formation (APF), we plotted log-transformed average expression levels at 28h APF versus log-transformed expression levels at 24h APF. The Pearson correlation coefficient for this data was 0.962.
